# Supplementary material for: Derivation of Indices of Cognitive Change Among Hispanic Adults and Elders
Source: PubMed Central journal article supplement (PMC11372505; doi:10.1001/jamanetworkopen.2024.31180), 2024-09-03
Supplement: jamanetwopen-e2431180-s001.pdf [file jamanetwopen-e2431180-s001.pdf]

\*First name, last name, and suffix (if applicable) are required and will appear in PubMed.

| <b>*Group Name(s): Health and Aging Brain Study-Health Disparities</b> |                   |                              |                  |                                                         |                                          |                                                         |                                                                                            |
|------------------------------------------------------------------------|-------------------|------------------------------|------------------|---------------------------------------------------------|------------------------------------------|---------------------------------------------------------|--------------------------------------------------------------------------------------------|
| <b>*First Name and Middle Initial(s)</b>                               | <b>*Last Name</b> | <b>*Suffix (eg, Jr, III)</b> | Academic Degrees | Institution                                             | Location (city, state/province, country) | Role or Contribution, eg, chair, principal investigator | Group (if more than 1 Group listed in the byline) and/or Subgroup (eg, Steering Committee) |
| Sid                                                                    | O'Bryant          |                              | PhD              | University of North Texas Health Science Center         |                                          |                                                         |                                                                                            |
| Kristine                                                               | Yaffe             |                              | MD               | University of California - San Francisco                |                                          |                                                         |                                                                                            |
| Arthur                                                                 | Toga              |                              | PhD              | University of Southern California                       |                                          |                                                         |                                                                                            |
| Robert                                                                 | Rissman           |                              | PhD              | University of Southern California                       |                                          |                                                         |                                                                                            |
| Leigh                                                                  | Johnson           |                              | PHD              | University of North Texas Health Science Center         |                                          |                                                         |                                                                                            |
| Meredith                                                               | Braskie           |                              | PhD              | University of Southern California                       |                                          |                                                         |                                                                                            |
| Kevin                                                                  | King              |                              | MD               | Barrow Neurological Institute                           |                                          |                                                         |                                                                                            |
| James R.                                                               | Hall              |                              | PhD              | University of North Texas Health Science Center         |                                          |                                                         |                                                                                            |
| Melissa                                                                | Petersen          |                              | PhD              | University of North Texas Health Science Center         |                                          |                                                         |                                                                                            |
| Raymond                                                                | Palmer            |                              | PhD              | University of Texas Health Science Center - San Antonio |                                          |                                                         |                                                                                            |
| Robert                                                                 | Barber            |                              | PhD              | University of North Texas Health Science Center         |                                          |                                                         |                                                                                            |
| Yonggang                                                               | Shi               |                              | PhD              | University of Southern California                       |                                          |                                                         |                                                                                            |
| Fan                                                                    | Zhang             |                              | PhD              | University of North Texas Health Science Center         |                                          |                                                         |                                                                                            |
| Rajesh                                                                 | Nandy             |                              | PhD              | University of North Texas Health Science Center         |                                          |                                                         |                                                                                            |
| Roderick                                                               | McColl            |                              | PhD              | UT Southwestern Medical Center                          |                                          |                                                         |                                                                                            |
| David                                                                  | Mason             |                              | DO               | University of North Texas Health Science Center         |                                          |                                                         |                                                                                            |
| Bradley                                                                | Christian         |                              | PhD              | University of Wisconsin-Madison                         |                                          |                                                         |                                                                                            |
| Nicole                                                                 | Phillips          |                              | PhD              | University of North Texas Health Science Center         |                                          |                                                         |                                                                                            |
| Stephanie                                                              | Large             |                              | PhD              | University of North Texas Health Science Center         |                                          |                                                         |                                                                                            |
| Joe                                                                    | Lee               |                              | DrPH             | Columbia University                                     |                                          |                                                         |                                                                                            |
| Badri                                                                  | Vardarajan        |                              | PhD              | Columbia University                                     |                                          |                                                         |                                                                                            |
| Monica                                                                 | Rivera Mindt      |                              | PhD              | Fordham University                                      |                                          |                                                         |                                                                                            |
| Amrita                                                                 | Cheema            |                              | PhD              | Georgetown University                                   |                                          |                                                         |                                                                                            |
| Lisa                                                                   | Barnes            |                              | PhD              | Rush University                                         |                                          |                                                         |                                                                                            |
| Mark                                                                   | Mapstone          |                              | PhD              | University of California - Irvine                       |                                          |                                                         |                                                                                            |
| Annie                                                                  | Cohen             |                              | PhD              | University of Pittsburgh                                |                                          |                                                         |                                                                                            |
| Amy                                                                    | Kind              |                              | PhD              | University of Wisconsin-Madison                         |                                          |                                                         |                                                                                            |
| Ozioma                                                                 | Okonkwo           |                              | PhD              | University of Wisconsin-Madison                         |                                          |                                                         |                                                                                            |
| Raul                                                                   | Vintimilla        |                              | MD, MPH          | University of North Texas Health Science Center         |                                          |                                                         |                                                                                            |

Supplemental Online Content: Nonauthor Collaborators

\*First name, last name, and suffix (if applicable) are required and will appear in PubMed.

| *First Name and Middle Initial(s) | *Last Name    | *Suffix (eg, Jr, III) | Academic Degrees | Institution                                             | Location (city, state/province, country) | Role or Contribution, eg, chair, principal investigator | Group (if more than 1 Group listed in the byline) and/or Subgroup (eg, Steering Committee) |
|-----------------------------------|---------------|-----------------------|------------------|---------------------------------------------------------|------------------------------------------|---------------------------------------------------------|--------------------------------------------------------------------------------------------|
| Zhengyang                         | Zhou          |                       | PhD              | University of North Texas Health Science Center         |                                          |                                                         |                                                                                            |
| Michael                           | Donohue       |                       | PhD              | University of Southern California                       |                                          |                                                         |                                                                                            |
| Rema                              | Raman         |                       | PhD              | University of Southern California                       |                                          |                                                         |                                                                                            |
| Matthew                           | Borzage       |                       | PhD              | University of Southern California                       |                                          |                                                         |                                                                                            |
| Michelle                          | Mielke        |                       | PhD              | Wake Forest University                                  |                                          |                                                         |                                                                                            |
| Beau                              | Ances         |                       | PhD, MD          | Washington University in Saint Louis                    |                                          |                                                         |                                                                                            |
| Ganesh                            | Babulal       |                       | PhD              | Washington University School of Medicine in Saint Louis |                                          |                                                         |                                                                                            |
| Jorge                             | Llibre-Guerra |                       | MD               | Washington University School of Medicine in Saint Louis |                                          |                                                         |                                                                                            |
| Carl                              | Hill          |                       | PhD, MPH         | Alzheimer's Association                                 |                                          |                                                         |                                                                                            |
| Rocky                             | Vig           |                       | BS               | Midtown Medical Imaging                                 |                                          |                                                         |                                                                                            |
