# Supplementary material for: Derivation of Indices of Cognitive Change Among Hispanic Adults and Elders
Source: PubMed Central journal article supplement (PMC11372505; doi:10.1001/jamanetworkopen.2024.31180), 2024-09-03
Supplement: jamanetwopen-e2431180-s002.pdf [file jamanetwopen-e2431180-s002.pdf]

## Data Sharing Statement

Duff. Derivation of Indices of Cognitive Change Among Hispanic Adults and Elders. *JAMA Netw Open*. Published September 03, 2024. doi:10.1001/jamanetworkopen.2024.31180

### Data

**Data available:** Yes

**Data types:** Deidentified participant data

**How to access data:** <https://apps.unthsc.edu/itr/data-list>

**When available:** With publication

### Supporting Documents

**Document types:** None

### Additional Information

**Who can access the data:** researchers whose proposed use of the data has been approved

**Types of analyses:** for a specified purpose

**Mechanisms of data availability:** after approval of a proposal, or with a signed data access agreement
